# Supplementary material
Source: PubMed Central journal article supplement (PMC2866129)

Merrill et al Figure S1

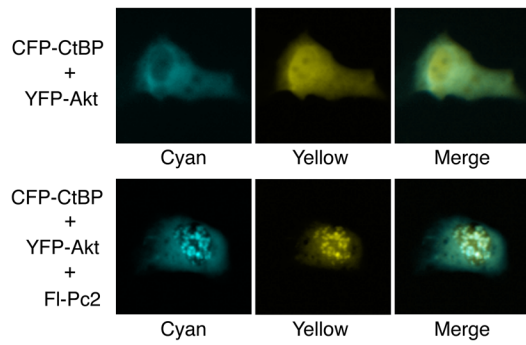

Merrill et al, Figure S2

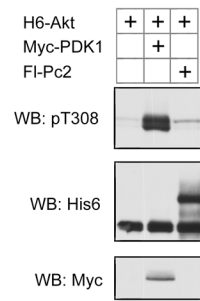

Merrill et al, Figure S3

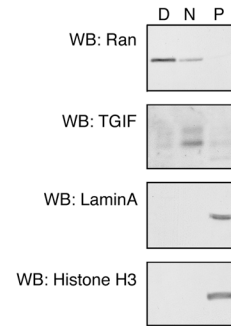

Merrill et al, Figure S4

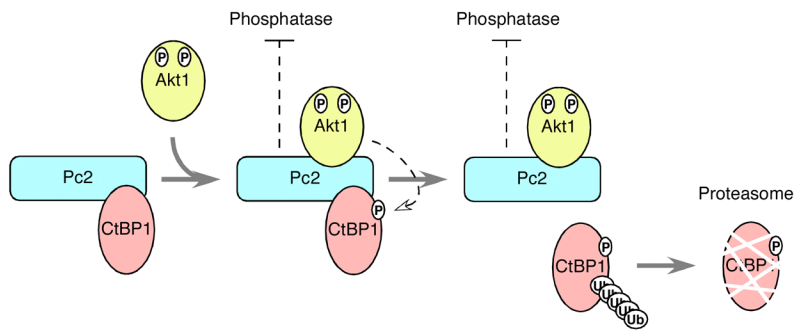

Supplement: NIHMS193497-supplement-04.pdf [file NIHMS193497-supplement-04.pdf]
